# Supplementary material
Source: publisher site journal article supplement (https://www.spandidos-publications.com/7466/downloadSupplementary)
Supplement: Supplementary file 1 [file downloadSupplementary]

## Sheet: Table SVI
Table SVII. The survival data and corresponding immunohistochemistry score of Renji cohort.
Patient number	IHC score	Overall survival time (months)	Overall survival status
1	6	7	1
2	2	56	0
3	0	55	0
4	4	54	0
5	3	53	0
6	2	52	0
7	1	51	0
8	2	50	0
9	1	50	0
10	6	49	0
11	0	46	0
12	3	56	0
13	6	55	0
14	1	54	0
15	0	53	0
16	2	52	0
17	1	51	0
18	1	50	0
19	4	49	0
20	6	13	1
21	9	4	1
22	6	56	0
23	2	55	0
24	4	54	0
25	8	31	1
26	2	52	0
27	6	51	0
28	2	50	0
29	2	49	0
30	2	49	0
31	6	19	1
32	2	56	0
33	0	55	0
34	1	54	0
35	1	53	0
36	0	52	0
37	2	17	1
38	3	50	0
39	1	28	1
40	1	6	1
41	0	46	0
42	2	56	0
43	2	31	1
44	2	54	0
45	2	53	0
46	0	52	0
47	1	3	1
48	1	10	1
49	2	49	0
50	2	15	1
51	6	58	0
52	3	56	0
53	6	4	1
54	4	54	0
55	1	53	0
56	4	35	1
57	2	7	1
58	2	50	0
59	2	49	0
60	4	49	0
61	2	58	0
62	1	56	0
63	1	55	0
64	0	17	1
65	1	7	1
66	6	43	1
67	3	51	0
68	4	50	0
69	8	49	0
70	1	0	1
71	6	10	1
72	0	56	0
73	2	55	0
74	9	54	0
75	4	1	1
76	1	52	0
77	2	51	0
78	1	50	0
79	3	49	0
80	0	49	0
81	2	58	0
82	0	56	0
83	8	11	1
84	0	54	0
85	3	53	0
86	0	52	0
87	2	51	0
88	1	50	0
89	2	49	0
90	4	49	0
91	2	58	0
92	0	56	0
93	3	54	0
94	0	54	0
95	2	53	0
96	0	52	0
97	12	23	1
98	2	49	0
99	1	48	0
100	2	25	1
101	6	58	0
102	4	22	1
103	0	54	0
104	1	54	0
105	6	33	1
106	3	27	1
107	1	51	0
108	0	50	0
109	3	30	1
110	2	18	1
111	4	57	0
112	6	56	0
113	2	12	1
114	0	54	0
115	2	53	0
116		51	0
117	2	19	1
118	8	7	1
119	1	48	0
120	0	49	0
121	4	57	0
122	8	45	1
123	1	54	0
124	0	53	0
125	0	9	1
126	2	51	0
127	4	44	1
128	2	49	0
129	2	35	1
130	6	10	1
131	6	57	0
132	2	55	0
133	3	54	0
134	0	53	0
135	1	13	1
136	0	51	0
137	2	51	0
138	2	49	0
139	0	31	1
140	9	12	1
141	3	57	0
142	2	55	0
143	2	54	0
144	2	53	0
145	2	52	0
146	1	19	1
147	6	50	0
148	1	13	1
149	2	5	1
150	4	49	0
151	6	57	0
152	2	55	0
153	6	54	0
154	6	49	1
155	2	52	0
156	2	16	1
157	0	50	0
158	1	13	1
159	4	49	0
160	8	49	0
